# Supplementary material for: Promotion of virus assembly and organization by the measles virus matrix protein
Source: PubMed Central journal article supplement (PMC5928126; doi:10.1038/s41467-018-04058-2), 2018-04-30
Supplement: 41467_2018_4058_MOESM2_ESM.pdf [file 41467_2018_4058_MOESM2_ESM.pdf]

## **Description of Additional Supplementary Files**

### **File Name: Supplementary Movie 1**

**Description: Cryo-ET of MeV-infected HeLa cells at the assembly site.** A MeV assembly site from the frozen-hydrated Edm MeV-infected HeLa cell demonstrates the viral structural organization in the context of whole-cell tomography.

### **File Name: Supplementary Movie 2**

**Description: Cryo-ET of MeV-infected MRC-5 cells at the assembly site.** A MeV assembly site from the frozen-hydrated Edm MeV-infected MRC-5 cell demonstrates the viral structural organization in the context of whole-cell tomography. Scale bar is 200 nm.

### **File Name: Supplementary Movie 3**

**Description: Cryo-ET of a released MeV particle from MeV-infected cells.** A released MeV particle from Edm MeV-infected HeLa cells demonstrates the viral structural organization. Note the M lattice and RNP are in register inside the native MeV particle.

### **File Name: Supplementary Movie 4**

**Description: Cryo-ET of MeV-infected cells at the assembly site.** A MeV assembly site from the frozen-hydrated recMeV-(H-118741x) infected HeLa cell demonstrates the viral structural organization in the context of whole-cell tomography. Note the F lattice on the surface of the native MeV particle.

### **File Name: Supplementary Movie 5**

**Description: Subvolume average of recMeV-(H-118741x) F-M lattice.**

Tomographic slices going from the bottom to the top (round trip) of the averaged recMeV-(H-118741x) F-M overlaid lattice structure. Black is density in the tomographic slices. In the segmentation view, blue is F and cyan is M. Scale bar is 10 nm.

### **File Name: Supplementary Movie 6**

**Description: Subvolume average of Edm F-M lattice.** Tomographic slices going from the bottom to the top of the averaged Edm F-M overlaid lattice structure. Black is density. Scale bar is 10 nm.

### **File Name: Supplementary Movie 7**

**Description: Model of MeV structural proteins organization.** Segmentation of the F-M lattice in conjunction with the RNP complex demonstrating the 3 layers of structural protein organization.

### **File Name: Supplementary Movie 8**

**Description: Clonemodel view of RNP classes within a tomogram.** The subvolumes extracted from the tomogram were placed back into the original volume. The color scheme is the same as **Figure 5**. Scale bar is 100 nm.

**File Name: Supplementary Movie 9**

**Description: RNP length quantification of a released MeV particle.** Tomographic slices going from the bottom to the top (round trip) of a released MeV particle from MeV-infected cells. The color scheme is the same as **Supplementary Figure 10**. The blue lines are M-coated RNP while the pink lines are uncoated RNP. Scale bar is 200 nm.

**File Name: Supplementary Movie 10**

**Description: RNP length quantification of a released MeV particle.** Tomographic slices going from the bottom to the top (round trip) of a released MeV particle from MeV-infected cells. The color scheme is the same as **Supplementary Figure 10**. The pink lines indicate the presence of the uncoated RNP. Scale bar is 200 nm.
